CORRECTION

# Correction: ADHD and family life: A cross-sectional study of ADHD prevalence among pupils in China and factors associated with parental depression

Tao Lv, Longlong Li, Ying Tang, Gerard Leavey

The first author's name is spelled incorrectly. The correct name is: Tao Lv. The correct citation is: Lv T, Li L, Tang Y, Leavey G (2024) ADHD and family life: A cross-sectional study of ADHD prevalence among pupils in China and factors associated with parental depression. PLoS ONE 19(3): e0281226. <https://doi.org/10.1371/journal.pone.0281226>.

## Reference

1. Lu T, Li L, Tang Y, Leavey G. ADHD and family life: A cross-sectional study of ADHD prevalence among pupils in China and factors associated with parental depression. PLoS One. 2024;19(3):e0281226. <https://doi.org/10.1371/journal.pone.0281226> PMID: [38483917](https://pubmed.ncbi.nlm.nih.gov/38483917/)

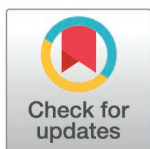

## OPEN ACCESS

**Citation:** Lv T, Li L, Tang Y, Leavey G (2025) Correction: ADHD and family life: A cross-sectional study of ADHD prevalence among pupils in China and factors associated with parental depression. PLoS One 20(6): e0326427. <https://doi.org/10.1371/journal.pone.0326427>

**Published:** June 13, 2025

**Copyright:** © 2025 Lv et al. This is an open access article distributed under the terms of the [Creative Commons Attribution License](https://creativecommons.org/licenses/by/4.0/), which permits unrestricted use, distribution, and reproduction in any medium, provided the original author and source are credited.
